# Hepatocellular carcinoma: ESMO Clinical Recommendations for diagnosis, treatment and follow-up

P. Parikh<sup>1</sup>, H. Malhotra<sup>2</sup> & S. Jelic<sup>3</sup>

On behalf of the ESMO Guidelines Working Group\*

<sup>1</sup>Department of Medical Oncology, Tata Memorial Hospital, Mumbai, India; <sup>2</sup>SMS Medical College, Jaipur, India; <sup>3</sup>Internal Medicine Service, Institute of Oncology and Radiology, Belgrade, Serbia

## incidence

Hepatocellular carcinoma (HCC) is the fifth most common cancer in men and eighth most common cancer in women worldwide. Its crude incidence in the European Union is 8.29/100 000. It is four to eight times more common in men and usually associated with chronic liver injury (hepatitis B, hepatitis C and alcoholic cirrhosis). Median age at diagnosis is between 50 and 60 years.

## diagnosis

Diagnosis is usually made by history, physical examination, imaging (ultrasound, MRI or CT scan showing a liver mass consistent with HCC) and elevated serum  $\alpha$ -fetoprotein (AFP 400 ng/ml). Confirmation of diagnosis is made by fine needle aspiration or biopsy. Elevation of AFP >400 ng/ml can be used instead of fine needle cytology for diagnosis of HCC in patients with liver cirrhosis and a focal hypervascular liver lesion (>2 cm) in at least one imaging technique. Patients with potentially resectable liver mass and AFP >400 ng/ml should undergo surgery without preoperative FNAC or biopsy.

## staging and risk assessment

Staging should include X-ray of chest and CT scan of the abdomen. Tumors should be staged according to AJCC staging criteria/TNM system. The fibrolamellar variant is not associated with cirrhosis and has a more favorable prognosis.

- Staging systems such as CLIP or BCLC that include staging of liver cirrhosis may improve prediction of the ultimate prognosis of HCC patients.
- Risk assessment is based on Pugh's modification of Child's grading of liver function.
- For patients being considered for liver transplantation, MELD score is also useful.

- Child–Pugh grade C patients should be offered only supportive care. Child–Pugh grade A and favorable grade B should be evaluated for specific treatment options.

## treatment plan

This should be based on extent of disease, growth pattern of tumor, hepatic functional reserve and patient's performance status.

### localized resectable tumors (T1, T2, T3 and selected T4; N0; M0)

Standard treatment is surgical resection (partial hepatectomy) for patients without liver cirrhosis [II, A]. For patients with liver cirrhosis, surgical resection or liver transplantation may be considered depending on hepatic functional reserve.

### localized unresectable tumors (selected T2, T3 and T4; N0; M0)

Total hepatectomy with liver transplantation should be considered first [II, A]. Other options include [IV, B]:

- Chemoembolization for patients with adequate hepatic functional reserve and multifocal HCC.
- Percutaneous ethanol injection for patients with fewer than three or four tumor nodules, maximum 5 cm in size.
- Radiofrequency ablation also for tumors <5 cm in size and/or fewer than four in number.
- Inclusion in clinical trials.
- Best supportive care.
- Systemic chemotherapy containing anthracyclines, cisplatin and 5-FU with a prospect of a 10% response rate and no survival benefit (if bilirubin normal and hepatic reserve adequate).

\*Correspondence to: ESMO Guidelines Working Group, ESMO Head Office, Via L. Taddei 4, CH-6962 Viganello-Lugano, Switzerland

Approved by the ESMO Guidelines Working Group: November 2007.

Conflict of interest: the authors have reported no conflict of interest.

In a phase II study Sorafenib induced response in 8% and disease control in 41% of patients. In a phase III study it extended survival for 2.8 months.

**Table 1.** TNM staging criteria for HCC

|                |                                                                                                                        |
|----------------|------------------------------------------------------------------------------------------------------------------------|
| T1             | Solitary tumor without vascular invasion                                                                               |
| T2             | Solitary tumor with vascular invasion or multiple tumors none more than 5 cm                                           |
| T3             | Multiple tumors more than 5 cm or tumor involving a major branch of the portal or hepatic vein(s)                      |
| T4             | Tumor(s) with direct invasion of adjacent organs other than the gallbladder or with perforation of visceral peritoneum |
| N0             | Indicates no nodal involvement                                                                                         |
| N1             | Indicates regional nodal involvement                                                                                   |
| M0             | Indicates no distant metastasis                                                                                        |
| M1             | Indicates metastasis presence beyond the liver                                                                         |
| Stage grouping |                                                                                                                        |
| Stage I        | T1 + N0 + M0                                                                                                           |
| Stage II       | T2 + N0 + M0                                                                                                           |
| Stage IIIA     | T3 + N0 + M0                                                                                                           |
| Stage IIIB     | T4 + N0 + M0                                                                                                           |
| Stage IIIC     | TX + N1 + M0                                                                                                           |
| Stage IVB      | TX + NX + M1                                                                                                           |

**Table 2.** CLIP classification

| Parameter                                 | Score |
|-------------------------------------------|-------|
| <b>Child–Pugh</b>                         |       |
| A                                         | 0     |
| B                                         | 1     |
| C                                         | 2     |
| <b>Tumour morphology</b>                  |       |
| Uninodular and extension <50% of tumour   | 0     |
| Multinodular and extension <50% of tumour | 1     |
| Massive or extension ≥50% of tumor        | 2     |
| <b>Alpha fetoprotein</b>                  |       |
| <400 ng/ml                                | 0     |
| >400 ng/ml                                | 1     |
| <b>Macro vascular invasion</b>            |       |
| No                                        | 0     |
| Yes                                       | 1     |

**advanced tumors (any T; N+; M1)**

There is no established standard of care. Systemic chemotherapy, inclusion in clinical trials and best supportive care should be considered

**follow-up**

Patients undergoing curative resection should be followed up 3- to 6-monthly with AFP determination and liver imaging (for 2 years)—since curative therapy can still be offered at relapse, to a minority. The indications for antiviral/IFN therapy for patients positive for hepatitis C and hepatitis B virus should depend on the degree of hepatitis and/or liver cirrhosis and viral replicative status. For other patients, follow-up aims to prevent and/or treat hepatic decompensation.

**Table 3.** Child–Pugh classification of severity of liver disease

| Parameter            | Points assigned |           |           |
|----------------------|-----------------|-----------|-----------|
|                      | 1               | 2         | 3         |
| Ascites              | Absent          | Slight    | Moderate  |
| Bilirrubin, mg/dl    | ≤ 2             | 2–3       | >3        |
| Albumin, g/dl        | >3.5            | 2.8–3.5   | <2.8      |
| Prothrombin time     |                 |           |           |
| Seconds over control | 1–3             | 4–6       | >6        |
| INR                  | <1.8            | 1.8–2.3   | >2.3      |
| Encephalopathy       | None            | Grade 1–2 | Grade 3–4 |

A total score of 5–6 is considered grade A (well-compensated disease); 7–9 is grade B (significant functional compromise); and 10–15 is grade C (decompensated disease).

**note**

Levels of evidence [I–V] and grades of recommendation [A–D] as used by the American Society of Clinical Oncology are given in square brackets. Statements without grading were considered justified standard clinical practice by the experts and the ESMO faculty.

**literature**

1. Tanaka H, Tsukuma H, Kasahara A et al. Effect of interferon therapy on the incidence of hepatocellular carcinoma and mortality of patients with chronic hepatitis C: a retrospective cohort study of 738 patients. *Int J Cancer* 2000; 87: 741–749.
2. Nishiguchi S, Kuroki T, Nakatani S et al. Randomised trial of effects of interferon alpha on incidence of hepatocellular carcinoma in chronic active hepatitis C with cirrhosis. *Lancet* 1995; 346: 1051–1055.
3. Mazzaferro V, Regalia E, Doci R et al. Liver transplantation for the treatment of small hepatocellular carcinomas in patients with cirrhosis. *N Engl J Med* 1996; 334: 693–699.
4. Llovet JM, Bruix J, Gores GJ. Surgical resection versus transplantation for early hepatocellular carcinoma: clues for the best strategy. *Hepatology* 2000; 31: 1019–1021.
5. Leung TWT, Patt YZ, Lau W-Y et al. Complete pathological remission is possible with systemic combination chemotherapy for inoperable hepatocellular carcinoma. *Clin Cancer Res* 1999; 5: 1676–1681.
6. Bergsland EK, Venook AP. Hepatocellular carcinoma. *Curr Opin Oncol* 2000; 12: 357–361.
7. El-Serag HB, Mason AC. Rising incidence of hepatocellular carcinoma in the United States. *N Engl J Med* 1999; 340: 745–750.
8. Simonetti RG, Camma C, Fiorello F et al. Hepatocellular carcinoma: a worldwide problem and the major risk factors. *Dig Dis Sci* 1991; 36: 962–972.
9. Sitzmann JV, Abrams R. Improved survival for hepatocellular cancer with combination surgery and multimodality treatment. *Ann Surg* 1993; 217: 149–154.
10. Mathurin P, Rixe O, Carbonell N et al. Review article: overview of medical treatments in unresectable hepatocellular carcinoma – an impossible meta-analysis? *Aliment Pharmacol Ther* 1998; 12: 111–126.
11. Tanaka K, Nakamura S, Numata K et al. The long term efficacy of combined transcatheter arterial embolization and percutaneous ethanol injection in the treatment of patients with large hepatocellular carcinoma and cirrhosis. *Cancer* 1998; 82: 78–85.
12. Fong Y, Sun RL, Jarnagin W et al. An analysis of 412 cases of hepatocellular carcinoma at a Western center. *Ann Surg* 1999; 229: 790–799.
13. Hemming AW, Catral MS, Reed AI et al. Liver transplantation for hepatocellular carcinoma. *Ann Surg* 2001; 233: 652–659.
14. Pichlmayr R, Weimann A, Oldhafer KJ et al. Appraisal of transplantation for malignant tumors of the liver with special reference to early stage hepatocellular carcinoma. *Eur J Surg Oncol* 1998; 24: 60–67.
15. Zhou XD, Tang ZY. Cryotherapy for primary liver cancer. *Semin Surg Oncol* 1998; 14: 171–174.
